# Supplementary material
Source: Springer Nature journal article supplement (https://www.springermedizin.de/resource/supplementary/12891_2014_2039_MOESM1_ESM.pdf/9510126)

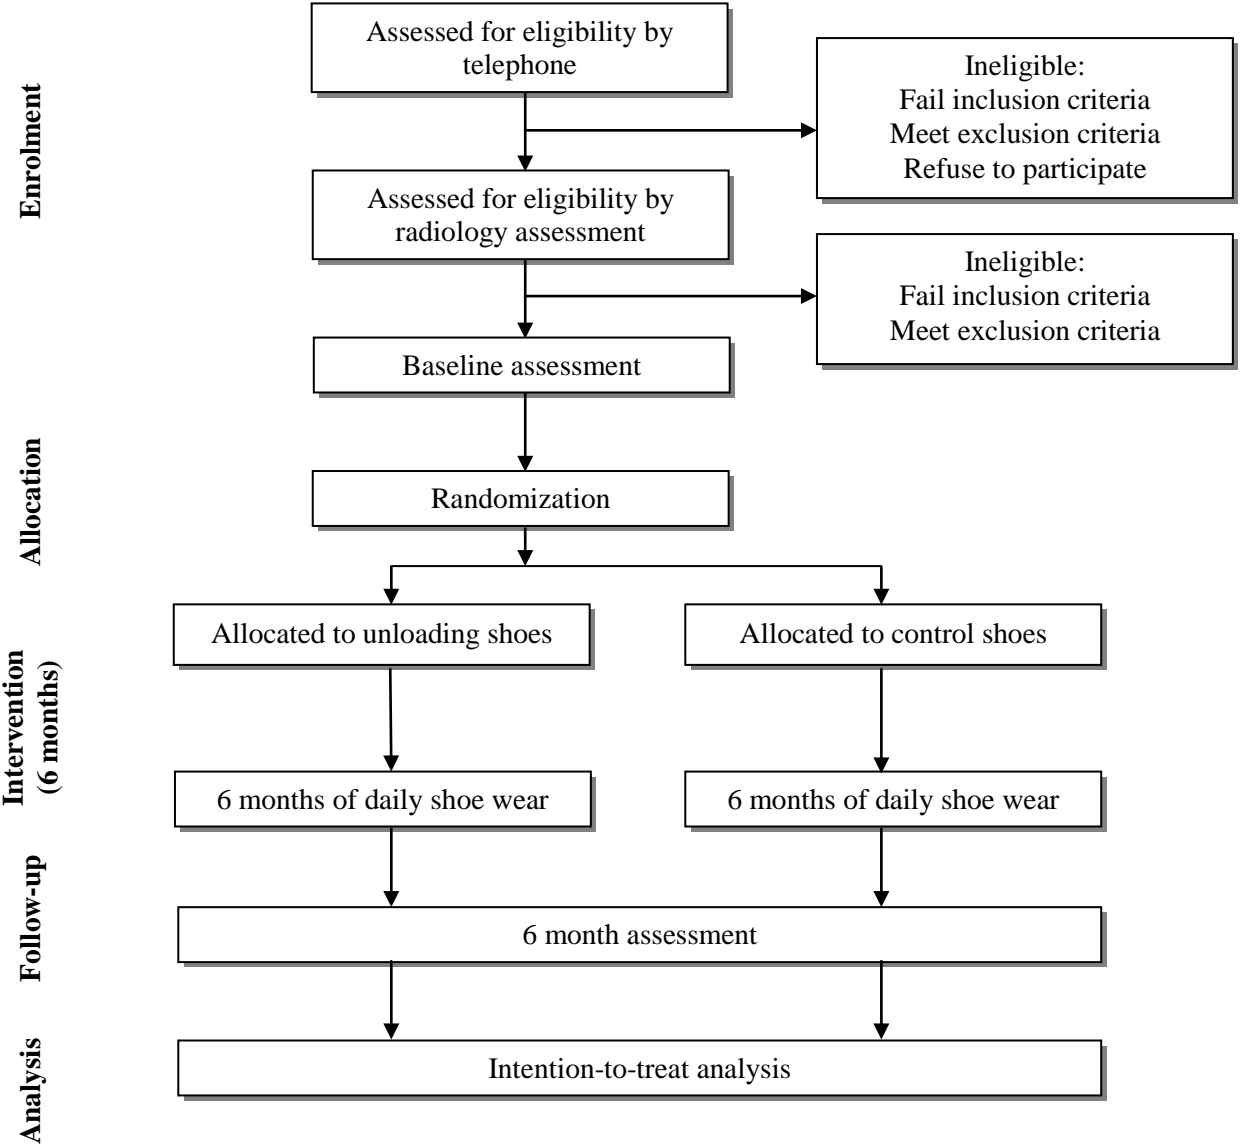

Supplement: MOESM1 [file 9510126]
